# Supplementary material for: Different Socio-Demographic and Lifestyle Factors Can Determine the Dietary Supplement Use in Children and Adolescents in Central-Eastern Poland
Source: MDPI journal article supplement (doi:10.3390/nu11030658), 2019-03-18
Supplement: s1 [file s1]

**Supplementary Material Table S1.** Characteristics of children (n=762) and adolescents (n=816) by socio-demographic and lifestyle determinants stratified by vitamin/mineral supplement (VMS) use

| Parameters                                        | Children ≤12 years                 |                           | <i>P</i> -value <sup>c</sup> | Adolescents >12 years              |                           | <i>P</i> -value <sup>c</sup> |
|---------------------------------------------------|------------------------------------|---------------------------|------------------------------|------------------------------------|---------------------------|------------------------------|
|                                                   | Users <sup>a</sup><br>n = 301<br>% | Non-users<br>n = 461<br>% |                              | Users <sup>a</sup><br>n = 166<br>% | Non-users<br>n = 650<br>% |                              |
| Gender                                            |                                    |                           |                              |                                    |                           |                              |
| Female                                            | 50.5                               | 49.5                      | 0.779                        | 71.7                               | 65.4                      | 0.124                        |
| Male                                              | 49.5                               | 50.5                      |                              | 28.3                               | 34.6                      |                              |
| Residential area <sup>b</sup>                     |                                    |                           |                              |                                    |                           |                              |
| Urban                                             | 84.6                               | 85.1                      | 0.835                        | 43.9                               | 42.4                      | 0.726                        |
| Rural                                             | 15.4                               | 14.9                      |                              | 56.1                               | 57.6                      |                              |
| Mother's education level <sup>b</sup>             |                                    |                           |                              |                                    |                           |                              |
| Primary                                           | 8.1                                | 14.8                      | 0.019                        | 16.7                               | 34.9                      | 0.001                        |
| High school                                       | 34.9                               | 34.1                      |                              | 55.6                               | 55.5                      |                              |
| University                                        | 57.0                               | 51.1                      |                              | 27.7                               | 9.6                       |                              |
| Socioeconomic status <sup>b</sup>                 |                                    |                           |                              |                                    |                           |                              |
| Very good or good                                 | 65.1                               | 69.6                      | 0.053                        | 61.5                               | 52.9                      | 0.108                        |
| Average                                           | 31.2                               | 24.3                      |                              | 28.9                               | 32.9                      |                              |
| Poor                                              | 3.7                                | 6.1                       |                              | 9.6                                | 14.2                      |                              |
| Physical activity (h/week) <sup>b, c</sup>        |                                    |                           |                              |                                    |                           |                              |
| < 1                                               | 31.2                               | 43.2                      | 0.003                        | 41.6                               | 51.2                      | 0.060                        |
| 1-5                                               | 61.2                               | 49.0                      |                              | 53.6                               | 43.4                      |                              |
| ≥ 6                                               | 7.6                                | 7.8                       |                              | 4.8                                | 5.4                       |                              |
| Body Mass Index (kg/m <sup>2</sup> ) <sup>b</sup> |                                    |                           |                              |                                    |                           |                              |
| < 18.5                                            | 15.1                               | 13.4                      | 0.019                        | 6.0                                | 14.4                      | 0.014                        |
| 18.5 – 24.9                                       | 61.3                               | 53.5                      |                              | 77.6                               | 72.3                      |                              |
| ≥ 25                                              | 23.6                               | 33.1                      |                              | 16.4                               | 13.3                      |                              |
| Health status <sup>b</sup>                        |                                    |                           |                              |                                    |                           |                              |
| At least good                                     | 95.3                               | 93.4                      | 0.281                        | 83.1                               | 87.9                      | 0.114                        |
| Average or poor                                   | 4.7                                | 6.6                       |                              | 16.9                               | 12.1                      |                              |
| Current chronic diseases                          |                                    |                           |                              |                                    |                           |                              |
| No                                                | 77.1                               | 88.3                      | <0.001                       | 91.6                               | 95.4                      | 0.052                        |
| Yes                                               | 22.9                               | 11.7                      |                              | 8.4                                | 4.6                       |                              |
| Special diet                                      |                                    |                           |                              |                                    |                           |                              |
| No                                                | 92.0                               | 94.8                      | 0.124                        | 84.9                               | 89.9                      | 0.073                        |
| Yes                                               | 8.0                                | 5.2                       |                              | 15.1                               | 10.1                      |                              |
| Number of meals/day                               |                                    |                           |                              |                                    |                           |                              |
| ≤ 3                                               | 10.0                               | 14.3                      | 0.052                        | 33.1                               | 43.4                      | 0.057                        |
| 4                                                 | 57.1                               | 59.7                      |                              | 47.6                               | 40.3                      |                              |
| ≥ 5                                               | 32.9                               | 26.0                      |                              | 19.3                               | 16.3                      |                              |
| Fortified food consumption                        |                                    |                           |                              |                                    |                           |                              |
| No                                                | 15.3                               | 38.0                      | <0.001                       | 18.1                               | 40.8                      | <0.001                       |
| Yes                                               | 84.7                               | 62.0                      |                              | 81.9                               | 59.2                      |                              |
| Diet modification                                 |                                    |                           |                              |                                    |                           |                              |
| Lack of modification                              | 65.1                               | 80.3                      | <0.001                       | 59.0                               | 79.1                      | <0.001                       |
| Excluding or including some foods                 | 18.3                               | 12.8                      |                              | 21.7                               | 12.3                      |                              |
| Simultaneously excluding and including some foods | 16.6                               | 6.9                       |                              | 19.3                               | 8.6                       |                              |

<sup>a</sup> supplement user – the person who used at least one VMS within at least one week or longer over the past 12 months

<sup>b</sup> missing data: place of residential area (1.4%), educational level of mother (39.7%), socioeconomic status of family (6.5%), BMI (1.4%) and health status (2.5%)

<sup>c</sup> time spent on being physically active, not including gymnastic classes at school

<sup>d</sup> chi-square test
